# Supplementary material for: Clinical Outcomes in Patients with CKD and Rapid or Non-rapid eGFR Decline: A Report from the DISCOVER CKD Retrospective Cohort
Source: PubMed Central journal article supplement — Adv Ther. 2024 Jul 3;41(8):3264–77. doi: 10.1007/s12325-024-02913-x (PMC11263227; doi:10.1007/s12325-024-02913-x), 2024-07-03
Supplement: 12325_2024_2913_MOESM1_ESM.pdf [file 12325_2024_2913_MOESM1_ESM.pdf]

---

# Clinical Outcomes in Patients with CKD and Rapid or Non-Rapid eGFR Decline: A Report from the DISCOVER CKD Retrospective Cohort

Hiddo Heerspink<sup>1</sup>, Stephen Nolan<sup>2</sup>, Juan-Jesus Carrero<sup>3</sup>, Matthew Arnold<sup>4</sup>,  
Roberto Pecoits-Filho<sup>5,6</sup>, Juan José García Sánchez<sup>7</sup>, Eric Wittbrodt<sup>8</sup>,  
Claudia Cabrera<sup>9</sup>, Carolyn S.P. Lam<sup>10,11</sup>, Hungta Chen<sup>12</sup>, Eiichiro Kanda<sup>13</sup>,  
Mitja Lainscak<sup>14,15</sup>, Carol Pollock<sup>16</sup>, David C. Wheeler<sup>17</sup>

<sup>1</sup>Department of Clinical Pharmacy and Pharmacology, University of Groningen, Groningen, The Netherlands; <sup>2</sup>Global Medical Affairs, BioPharmaceuticals Medical, AstraZeneca, Cambridge, UK; <sup>3</sup>Department of Medical Epidemiology and Biostatistics, Karolinska Institutet, Stockholm, Sweden; <sup>4</sup>Real World Data Science, BioPharmaceuticals Medical, AstraZeneca, Cambridge, UK; <sup>5</sup>School of Medicine, Pontifical Catholic University of Parana, Curitiba, Brazil; <sup>6</sup>Arbor Research Collaborative for Health, Ann Arbor, MI, USA; <sup>7</sup>Global Market Access and Pricing, BioPharmaceuticals Medical, AstraZeneca, Cambridge, UK; <sup>8</sup>Cardiovascular, Renal, Metabolism Epidemiology, BioPharmaceuticals Medical, AstraZeneca, Gaithersburg, MD, USA; <sup>9</sup>Real World Science & Analytics, BioPharmaceuticals Medical, AstraZeneca, Gothenburg, Sweden; <sup>10</sup>Department of Cardiology, National Heart Centre, Singapore; <sup>11</sup>Duke-NUS Medical School, Singapore; <sup>12</sup>Medical and Payer Evidence Statistics, BioPharmaceuticals Medical, AstraZeneca, Gaithersburg, MD, USA; <sup>13</sup>Kawasaki Medical School, Kurashiki, Japan; <sup>14</sup>Division of Cardiology, General Hospital Murska Sobota, Murska Sobota, Slovenia; <sup>15</sup>Faculty of Medicine, University of Ljubljana, Ljubljana, Slovenia; <sup>16</sup>Kolling Institute, Royal North Shore

*Hospital, University of Sydney, Sydney, NSW, Australia; <sup>17</sup>Department of Renal  
Medicine, University College London, London, UK*

**Corresponding author:** Hiddo Heerspink; E-mail: [h.j.lambers.heerspink@umcg.nl](mailto:h.j.lambers.heerspink@umcg.nl)

## Supplementary Material

**Table S1. Baseline characteristics of patients with CKD with rapid and non-rapid eGFR decline (2 years post-index)**

| Variable                                                     | UK CPRD<br>(N = 206,364) |                       | US TriNetX<br>(N = 462,352) |                        | US LCED<br>(N = 95,739) |                        | Japan MDV<br>(N = 39,782) |               |
|--------------------------------------------------------------|--------------------------|-----------------------|-----------------------------|------------------------|-------------------------|------------------------|---------------------------|---------------|
|                                                              | Rapid                    | Non-rapid             | Rapid                       | Non-rapid              | Rapid                   | Non-rapid              | Rapid                     | Non-rapid     |
| N (%)                                                        | 10,183 (4.9)             | 196,181 (95.1)        | 83,508 (18.1)               | 378,844 (81.9)         | 11,939 (12.5)           | 83,800 (87.5)          | 4864 (12.2)               | 34,918 (87.8) |
| Follow-up time per patient (from index), years, median (IQR) | 4.5 (3.1–5.0)            | 5.0 (3.4–5.0)         | 3.8 (2.8–5.0)               | 4.0 (2.9–5.0)          | 3.7 (2.8–4.9)           | 3.8 (2.9–5.0)          | 3.3 (2.6–4.7)             | 3.6 (2.7–5.0) |
| Age, years, mean (SD)                                        | 72.1 (11.9)              | 69.3 (11.6)           | 65.9 (12.7)                 | 65.4 (12.1)            | 70.0 (12.5)             | 68.3 (12.0)            | 74.0 (12.2)               | 71.2 (12.4)   |
| Female, %                                                    | 54.7                     | 54.6                  | 58.6                        | 58.4                   | 57.5                    | 56.2                   | 51.7                      | 51.1          |
| Blood pressure, mmHg, systolic/diastolic, mean (SD)          | 132.2/73.7 (17.9/10.5)   | 133.5/76.1 (15.0/9.4) | 130.0/73.8 (19.2/11.5)      | 129.5/75.1 (17.5/10.6) | 128.1/71.8 (18.8/11.7)  | 129.0/74.3 (16.8/10.5) | NR                        | NR            |
| Missing data, %                                              | 7.7/7.7                  | 16.3/16.3             | 29.4/29.4                   | 33.4/33.4              | 16.2/16.4               | 21.0/21.2              | 100                       | 100           |
| HbA1c, %, median (IQR)                                       | 6.6 (5.9–7.6)            | 6.3 (5.7–7.1)         | 6.5 (5.8–7.7)               | 6.2 (5.7–7.1)          | 6.5 (5.9–7.5)           | 6.2 (5.7–7.0)          | 6.1 (5.6–6.8)             | 6.0 (5.6–6.6) |
| Missing data, %                                              | 56.4                     | 72.7                  | 57.6                        | 66.8                   | 59.3                    | 68.3                   | 36.3                      | 45.7          |

|                                                   |                  |                  |                  |                  |                  |                  |                  |                  |
|---------------------------------------------------|------------------|------------------|------------------|------------------|------------------|------------------|------------------|------------------|
| sK <sup>+</sup> , mmol/L, mean (SD)               | 4.6 (0.5)        | 4.5 (0.4)        | 4.3 (0.5)        | 4.2 (0.5)        | 4.3 (0.5)        | 4.3 (0.4)        | 4.3 (0.5)        | 4.3 (0.4)        |
| Missing data, %                                   | 4.7              | 19.2             | 16.5             | 24.9             | 13.1             | 26.1             | 9.6              | 21.9             |
| eGFR, mL/min/1.73 m <sup>2</sup> , median (IQR)   | 50.1 (41.1–57.8) | 68.4 (60.4–75.9) | 54.9 (43.9–64.1) | 68.8 (59.6–77.8) | 53.9 (43.3–64.0) | 67.9 (58.6–76.5) | 52.0 (40.9–60.4) | 64.3 (54.7–72.4) |
| Number of eGFR tests per patient*, mean (SD)      | 6.9 (7.4)        | 3.0 (3.5)        | 10.9 (17.1)      | 5.5 (9.9)        | 10.5 (14.7)      | 4.6 (7.1)        | 12.7 (11.1)      | 7.7 (7.9)        |
| eGFR category, mL/min/1.73 m <sup>2</sup> , n (%) |                  |                  |                  |                  |                  |                  |                  |                  |
| 15–< 30                                           | 86 (0.8)         | 1453 (0.7)       | 2348 (2.8)       | 7398 (2.0)       | 241 (2.0)        | 1256 (1.5)       | 158 (3.3)        | 784 (2.3)        |
| 30–< 45                                           | 521 (5.1)        | 8514 (4.3)       | 8190 (9.8)       | 27,325 (7.2)     | 1166 (9.8)       | 6281 (7.5)       | 487 (10.0)       | 3133 (9.0)       |
| 45–< 60                                           | 2357 (23.1)      | 42,753 (21.8)    | 20,768 (24.9)    | 90,238 (23.8)    | 3142 (26.3)      | 21,104 (25.2)    | 1282 (26.4)      | 9653 (27.6)      |
| 60–75                                             | 7214 (70.8)      | 143,299 (73.0)   | 51,781 (62.0)    | 251,896 (66.5)   | 7357 (61.6)      | 54,970 (65.6)    | 2930 (60.2)      | 21,267 (60.9)    |
| UACR, mg/g, median (IQR)                          | 18.4 (6.6–79.7)  | 10.5 (4.8–30.1)  | 25.0 (9.6–157.1) | 15.0 (6.7–52.1)  | 18.0 (7.0–74.0)  | 10.1 (4.4–32.9)  | NR               | NR               |
| Missing data, %                                   | 64.1             | 80.9             | 98.6             | 99.1             | 96.1             | 97.6             | 100              | 100              |
| CRP, mg/L, mean (SD)                              | 17.19 (39.95)    | 9.81 (23.44)     | 13.18 (36.50)    | 9.05 (26.17)     | 28.60 (57.56)    | 18.25 (42.62)    | 8.74 (20.77)     | 6.66 (17.88)     |
| Missing data, %                                   | 73.1             | 83.5             | 91.9             | 94.3             | 95.8             | 97.5             | 42.9             | 58.4             |

\*Number of eGFR tests per patient during the period after index and up to 2 years (used to calculate eGFR slope).

*CKD* chronic kidney disease, *CPRD* Clinical Practice Research Datalink, *CRP* C-reactive protein, *eGFR* estimated glomerular filtration rate, *HbA1c* glycated hemoglobin, *IQR* interquartile range, *LCED* Limited Claims and Electronic Health Record Dataset, *MDV* Medical Data Vision, *NR* not reported, *SD* standard deviation, *sK<sup>+</sup>* serum potassium, *UACR* urine albumin-to-creatinine ratio.

**Table S2. Baseline characteristics of patients with CKD with and without eGFR slope data (2 years post-index)**

| Variable                         | UK CPRD     |             | US TriNetX  |             | US LCED     |             | Japan MDV   |             |
|----------------------------------|-------------|-------------|-------------|-------------|-------------|-------------|-------------|-------------|
|                                  | With        | Without     | With        | Without     | With        | Without     | With        | Without     |
| <b>eGFR slope data</b>           |             |             |             |             |             |             |             |             |
| <i>N</i>                         | 206,364     | 33,245      | 462,352     | 50,519      | 95,739      | 14,188      | 39,782      | 4,082       |
| Age, years, mean (SD)            | 69.5 (11.6) | 66.1 (13.0) | 65.5 (12.2) | 63.4 (12.9) | 68.5 (12.0) | 66.6 (12.5) | 71.6 (12.4) | 71.3 (12.9) |
| Female, %                        | 54.6        | 58.9        | 58.4        | 60.7        | 56.4        | 57.7        | 51.1        | 54.8        |
| Ethnicity, %                     |             |             |             |             |             |             |             |             |
| Hispanic or Latino               | 0           | 0           | 2.7         | 2.0         | 0           | 0           | 0           | 0           |
| Not Hispanic or Latino           | 0           | 0           | 57.0        | 63.6        | 0           | 0           | 0           | 0           |
| Unavailable                      | 100         | 100         | 0           | 0           | 100         | 100         | 100         | 100         |
| Unknown                          | 0           | 0           | 40.3        | 34.5        | 0           | 0           | 0           | 0           |
| Race, %,                         |             |             |             |             |             |             |             |             |
| American Indian or Alaska Native | 0           | 0           | 0.4         | 0.4         | 0           | 0           | 0           | 0           |

|                                           |      |      |      |      |      |      |     |     |
|-------------------------------------------|------|------|------|------|------|------|-----|-----|
| Asian                                     | 1.7  | 1.3  | 1.2  | 1.2  | 0    | 0    | 0   | 0   |
| Black or African American                 | 1.4  | 2.1  | 19.6 | 20.4 | 0    | 0    | 0   | 0   |
| Native Hawaiian or other Pacific Islander | 0    | 0    | 0.1  | 0.1  | 0    | 0    | 0   | 0   |
| Other                                     | 1.0  | 1.0  | 0    | 0    | 0    | 0    | 0   | 0   |
| Unavailable                               | 0    | 0    | 0    | 0    | 100  | 100  | 100 | 100 |
| Unknown                                   | 12.6 | 14.8 | 0.8  | 0.4  | 0    | 0    | 0   | 0   |
| White                                     | 83.2 | 80.9 | 78.0 | 77.5 | 0    | 0    | 0   | 0   |
| Drinker of alcohol, %                     |      |      |      |      |      |      |     |     |
| No                                        | 30.3 | 24.7 | 0    | 0    | 30.4 | 21.3 | 0   | 0   |
| Quit                                      | 3.6  | 2.3  | 0    | 0    | 0.1  | 0.1  | 0   | 0   |
| Yes                                       | 60.6 | 64.7 | 0    | 0    | 24.4 | 21.9 | 1.5 | 0.8 |
| Smoking status, %                         |      |      |      |      |      |      |     |     |
| Current                                   | 11.9 | 12.7 | 0    | 0    | 5.9  | 4.9  | 0   | 0   |
| Former                                    | 35.1 | 28.4 | 0    | 0    | 21.6 | 15.1 | 0   | 0   |
| Never                                     | 0    | 0    | 0    | 0    | 45.6 | 41.4 | 0   | 0   |



---

|         |      |      |   |   |     |     |   |   |
|---------|------|------|---|---|-----|-----|---|---|
| Non     | 52.8 | 58.6 | 0 | 0 | 0.2 | 0.2 | 0 | 0 |
| Passive | 0    | 0    | 0 | 0 | 0.3 | 0.2 | 0 | 0 |

---

CKD chronic kidney disease, CPRD Clinical Practice Research Datalink, eGFR estimated glomerular filtration rate, LCED Limited Claims and Electronic Health Record

Dataset, MDV Medical Data Vision, SD standard deviation.

**Table S3. Additional baseline characteristics of patients with CKD with rapid and non-rapid eGFR decline (2 years post-index)**

| Variable                           | UK CPRD<br>(N = 206,364) |                | US TriNetX<br>(N = 462,352) |                | US LCED<br>(N = 95,739) |               | Japan MDV<br>(N = 39,782) |               |
|------------------------------------|--------------------------|----------------|-----------------------------|----------------|-------------------------|---------------|---------------------------|---------------|
|                                    | Rapid                    | Non-rapid      | Rapid                       | Non-rapid      | Rapid                   | Non-rapid     | Rapid                     | Non-rapid     |
| N (%)                              | 10,183 (4.9)             | 196,181 (95.1) | 83,508 (18.1)               | 378,844 (81.9) | 11,939 (12.5)           | 83,800 (87.5) | 4864 (12.2)               | 34,918 (87.8) |
| BMI, kg/m <sup>2</sup> , mean (SD) | 29.46 (6.58)             | 29.09 (6.00)   | 29.12 (5.37)                | 28.87 (5.17)   | 30.48 (7.34)            | 30.17 (6.77)  | NR                        | NR            |
| Missing data, %                    | 37.8                     | 47.2           | 52.9                        | 55.0           | 16.8                    | 21.3          | 100                       | 100           |
| Serum albumin, g/dL, mean (SD)     | 4.07 (0.50)              | 4.19 (0.40)    | 3.87 (0.56)                 | 4.00 (0.47)    | 4.14 (0.42)             | 4.24 (0.34)   | 3.91 (0.54)               | 4.09 (0.46)   |
| Missing data, %                    | 18.2                     | 31.3           | 32.2                        | 41.2           | 93.3                    | 93.2          | 26.2                      | 36.4          |
| Cystatin C, mg/L, mean (SD)        | NR                       | NR             | 1.82 (0.85)                 | 1.36 (0.61)    | 1.52 (0.62)             | 1.18 (0.42)   | NR                        | NR            |
| Missing data, %                    | 100                      | 100            | 99.7                        | 99.9           | 99.9                    | 100           | 100                       | 100           |
| Serum Ca, mg/dL, mean (SD)         | 9.35 (0.57)              | 9.42 (0.46)    | 9.34 (0.61)                 | 9.40 (0.52)    | 9.30 (0.60)             | 9.40 (0.49)   | 9.09 (0.62)               | 9.17 (0.51)   |
| Missing data, %                    | 69.1                     | 78.5           | 19.2                        | 28.9           | 25.4                    | 34.9          | 54.7                      | 68.4          |
| Serum Na, mg/dL, mean (SD)         | 139.49 (3.30)            | 140.07 (2.87)  | 139.15 (3.20)               | 139.50 (2.86)  | 139.50 (3.15)           | 139.78 (2.81) | 140.65 (2.95)             | 140.90 (2.70) |

|                                     |                |                |                |                |                |                |                |                |
|-------------------------------------|----------------|----------------|----------------|----------------|----------------|----------------|----------------|----------------|
| Missing data, %                     | 4.8            | 18.9           | 17.0           | 25.4           | 14.7           | 26.8           | 10.7           | 23.3           |
| Total cholesterol, mg/dL, mean (SD) | 177.19 (47.65) | 184.65 (44.05) | 174.73 (46.54) | 178.67 (42.05) | 171.55 (44.15) | 177.84 (40.92) | 183.38 (39.05) | 186.64 (35.47) |
| Missing data, %                     | 28.3           | 35.3           | 49.0           | 48.3           | 43.0           | 43.6           | 39.0           | 45.3           |
| HDL cholesterol, mmol/L, mean (SD)  | 1.35 (0.46)    | 1.42 (0.43)    | 1.25 (0.42)    | 1.31 (0.42)    | 1.28 (0.45)    | 1.34 (0.43)    | 1.43 (0.42)    | 1.50 (0.42)    |
| Missing data, %                     | 36.8           | 41.7           | 54.5           | 52.9           | 48.3           | 47.8           | 34.4           | 39.8           |
| LDL cholesterol, mmol/L, mean (SD)  | 2.51 (1.06)    | 2.72 (1.01)    | 2.51 (0.97)    | 2.61 (0.90)    | 2.41 (0.93)    | 2.57 (0.88)    | 2.76 (0.80)    | 2.79 (0.73)    |
| Missing data, %                     | 50.4           | 52.9           | 47.1           | 46.2           | 43.3           | 43.0           | 40.7           | 42.7           |
| Hb, g/dL, mean (SD)                 | 12.68 (1.76)   | 13.67 (1.48)   | 12.73 (2.00)   | 13.44 (1.77)   | 12.63 (1.94)   | 13.49 (1.69)   | 12.57 (1.96)   | 13.39 (1.74)   |
| Missing data, %                     | 20.1           | 38.3           | 22.4           | 35.1           | 30.2           | 46.0           | 8.2            | 19.6           |

*BMI* body mass index, *Ca* calcium, *CKD* chronic kidney disease, *CPRD* Clinical Practice Research Datalink, *eGFR* estimated glomerular filtration rate, *Hb* hemoglobin, *HDL* high-density lipoprotein, *LCED* Limited Claims and Electronic Health Record Dataset, *LDL* low-density lipoprotein, *MDV* Medical Data Vision, *Na* sodium, *NR* not reported, *SD* standard deviation.

**Table S4. Comorbidity burden in patients with CKD with rapid and non-rapid eGFR decline at baseline (2 years post-index)**

|                       | UK CPRD<br>(N = 206,364) |                | US TriNetX<br>(N = 462,352) |                | US LCED<br>(N = 95,739) |               | Japan MDV<br>(N = 39,782) |               |
|-----------------------|--------------------------|----------------|-----------------------------|----------------|-------------------------|---------------|---------------------------|---------------|
| eGFR decline category | Rapid                    | Non-rapid      | Rapid                       | Non-rapid      | Rapid                   | Non-rapid     | Rapid                     | Non-rapid     |
| N (%)                 | 10,183 (4.9)             | 196,181 (95.1) | 83,508 (18.1)               | 378,844 (81.9) | 11,939 (12.5)           | 83,800 (87.5) | 4864 (12.2)               | 34,918 (87.8) |
| Comorbidity, n (%)    |                          |                |                             |                |                         |               |                           |               |
| Hyperkalemia          | 248 (2.4)                | 1190 (0.6)     | 7174 (8.6)                  | 14,778 (3.9)   | 817 (6.8)               | 2786 (3.3)    | 201 (4.1)                 | 493 (1.4)     |
| Atrial fibrillation   | 1834 (18.0)              | 17,747 (9.1)   | 13,170 (15.8)               | 40,328 (10.7)  | 2340 (19.6)             | 10,260 (12.2) | 967 (19.9)                | 4424 (12.7)   |
| Anemia                | 1652 (16.2)              | 16,676 (8.5)   | 30,396 (36.4)               | 90,564 (23.9)  | 4523 (37.9)             | 20,985 (25.0) | 1798 (37.0)               | 8855 (25.4)   |

CKD chronic kidney disease, CPRD Clinical Practice Research Datalink, eGFR estimated glomerular filtration rate, LCED Limited Claims and Electronic Health Record Dataset, MDV Medical Data Vision.

**Table S5. Proportion of patients with CKD with prescribed medications at baseline (2 years post-index)**

| Medication, %          | UK CPRD<br>(N = 206,364) |           | US TriNetX<br>(N = 462,352) |           | US LCED<br>(N = 95,739) |           | Japan MDV<br>(N = 39,782) |           |
|------------------------|--------------------------|-----------|-----------------------------|-----------|-------------------------|-----------|---------------------------|-----------|
|                        | Rapid                    | Non-rapid | Rapid                       | Non-rapid | Rapid                   | Non-rapid | Rapid                     | Non-rapid |
| RAASi*                 | 58.5                     | 42.2      | 14.5                        | 10.8      | 36.1                    | 31.3      | 43.3                      | 33.7      |
| MRA                    | 9.7                      | 1.8       | 2.5                         | 1.1       | 5.7                     | 2.3       | 10.0                      | 3.3       |
| Diuretics              | 47.4                     | 25.0      | 14.8                        | 8.9       | 34.4                    | 23.7      | 24.0                      | 10.5      |
| SGLT2i                 | 0.7                      | 0.4       | 0.3                         | 0.2       | 1.3                     | 0.9       | 1.7                       | 1.2       |
| Insulin                | 8.4                      | 2.7       | 7.6                         | 3.2       | 11.7                    | 5.0       | 9.7                       | 5.1       |
| K <sup>+</sup> binders | < 0.1                    | < 0.1     | 0.4                         | 0.1       | 0.6                     | 0.1       | 1.9                       | 0.5       |
| Statins                | 53.0                     | 44.8      | 13.9                        | 10.5      | 37.3                    | 32.7      | 28.2                      | 28.8      |
| Antiplatelets          | 35.6                     | 25.1      | 2.6                         | 1.4       | 7.2                     | 4.3       | 26.4                      | 20.8      |
| Anticoagulants         | 14.2                     | 6.5       | 8.3                         | 4.4       | 16.5                    | 8.2       | 13.1                      | 8.7       |
| Beta blockers          | 35.3                     | 22.0      | 13.1                        | 8.1       | 31.7                    | 22.5      | 20.4                      | 13.3      |

\*RAASi included angiotensin-converting enzyme inhibitors, angiotensin receptor blockers, and MRAs.

CKD chronic kidney disease, CPRD Clinical Practice Research Datalink, K<sup>+</sup> potassium, LCED Limited Claims and Electronic Health Record Dataset, MDV Medical Data Vision, MRA mineralocorticoid receptor antagonist, RAASi renin-angiotensin-aldosterone system inhibitor, SGLT2i sodium-glucose co-transporter-2 inhibitor.

Fig. S1. Patients' attrition by database

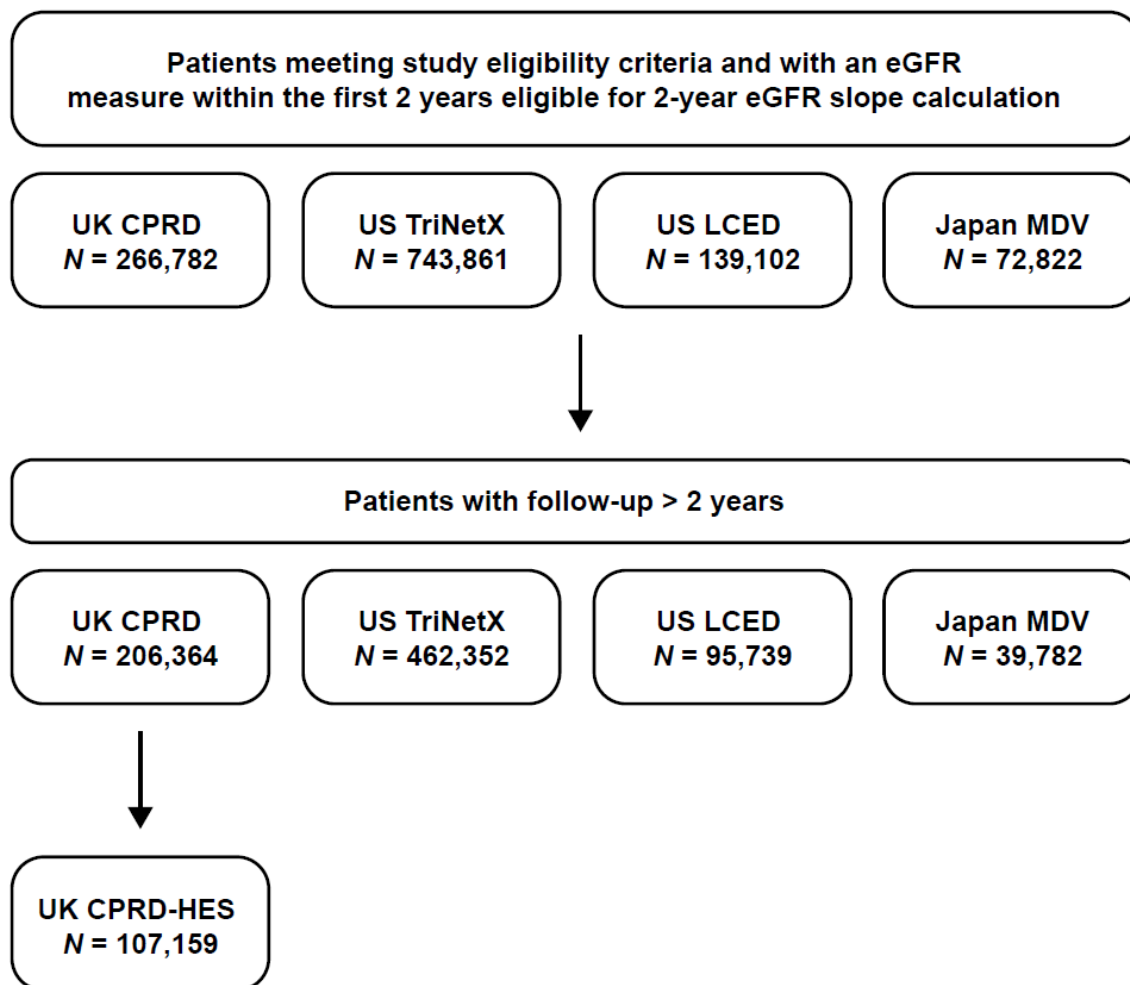

*CPRD* Clinical Practice Research Datalink, *eGFR* estimated glomerular filtration rate, *HES* hospital episode statistics, *LCED* Limited Claims and Electronic Health Record Dataset, *MDV* Medical Data Vision.

**Fig. S2. Competing risks analysis of clinical outcomes in patients with rapid versus non-rapid eGFR decline (2 years post-index)**

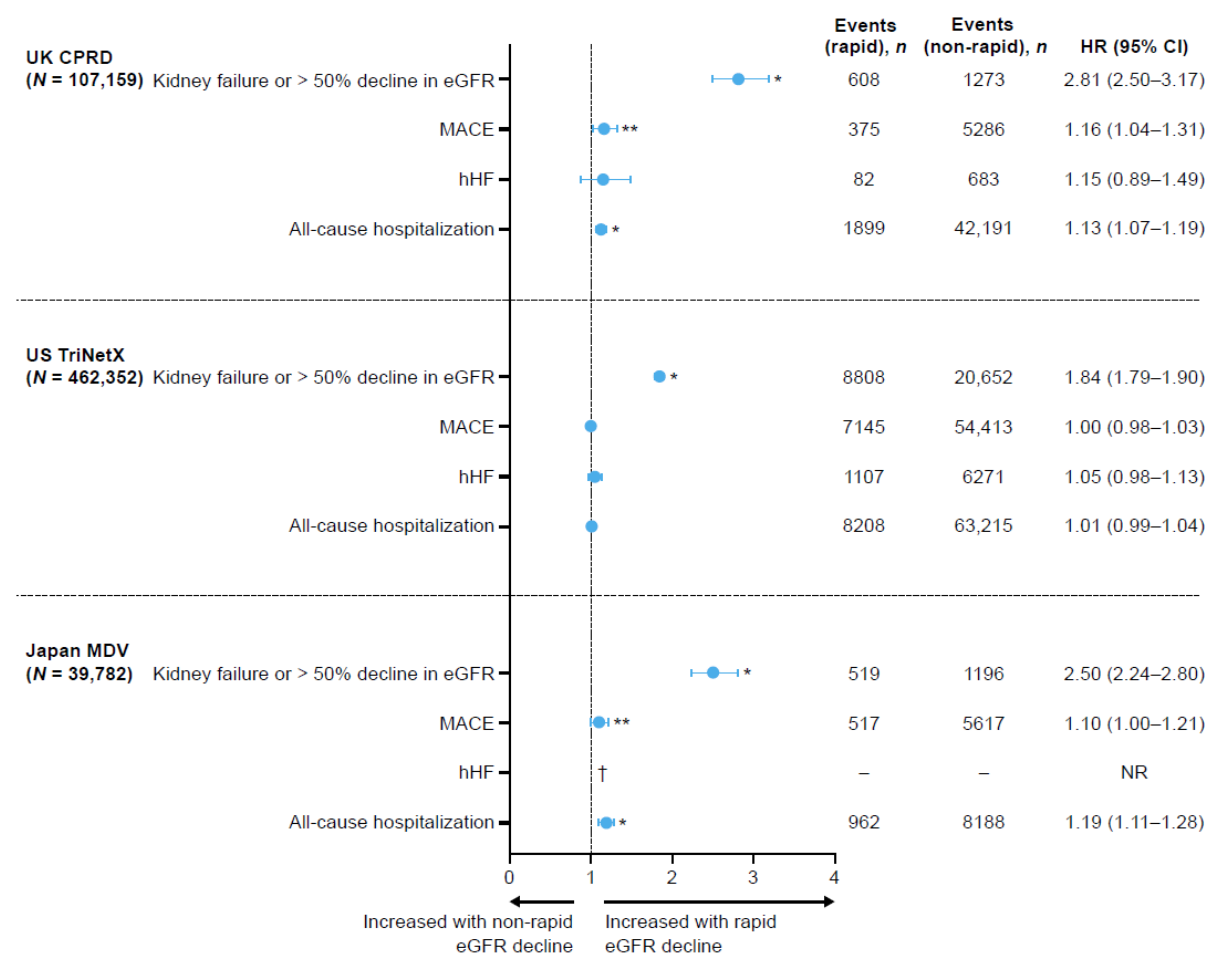

\* $P < 0.01$  for rapid versus non-rapid progressors; \*\* $P < 0.05$  for rapid versus non-rapid progressors. †Data not available.

Cox proportional hazards models adjusted for baseline age, sex, race (where available), diastolic blood pressure, systolic blood pressure, body mass index, high- and low-density lipoprotein, eGFR, urine albumin-to-creatinine ratio, medications, log (natural logarithm) of the number of eGFR tests recorded prior to 2 years post-index, hemoglobin, serum potassium, and history of hypertension, type 2 diabetes, heart failure, stroke, and MI. MACE includes non-fatal MI, non-fatal stroke, and cardiovascular death, defined by diagnostic codes. Competing risks analyses were performed with mortality as competing.

CI confidence interval, CPRD Clinical Practice Research Datalink, eGFR estimated glomerular filtration rate, hHF hospitalization for heart failure, HR hazard ratio, MACE major adverse cardiovascular event, MDV Medical Data Vision, MI myocardial infarction, NR not reported.
